# Supplementary material for: Associations of decayed and filled teeth with localized stage II/III periodontitis in young adults: The CHIEF oral health study
Source: PubMed Central journal article supplement — J Dent Sci. 2021 Nov 23;17(2):1018–23. doi: 10.1016/j.jds.2021.10.018 (PMC9201549; doi:10.1016/j.jds.2021.10.018), 2021-11-23
Supplement: mmc1.pdf [file mmc1.pdf]

This document certifies that the manuscript

## **Associations between treated and untreated dental caries and periodontitis in young adults: The CHIEF Oral Health Study**

prepared by the authors

**Gen-Min Lin and Kun-Zhe Tsai**

was edited for proper English language, grammar, punctuation, spelling, and overall style by one or more of the highly qualified native English speaking editors at AJE.

This certificate was issued on **October 27, 2021** and may be verified on the [AJE website](#) using the verification code **7DB3-0525-81B1-1C15-267A**.

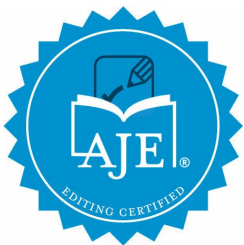

Neither the research content nor the authors' intentions were altered in any way during the editing process. Documents receiving this certification should be English-ready for publication; however, the author has the ability to accept or reject our suggestions and changes. To verify the final AJE edited version, please visit our verification page at [aje.com/certificate](#). If you have any questions or concerns about this edited document, please contact AJE at [support@aje.com](mailto:support@aje.com).
